# Supplementary material
Source: HighWire-hosted journal article supplement (https://cmaj.ca/highwire/filestream/59596/field_highwire_adjunct_files/7/150771-res-Appendix_6.pdf)
Supplement: 150771-res-Appendix_6.pdf [file 150771-res-Appendix_6.pdf]

**Appendix 6 (as supplied by the authors): Subgroup analysis of Risk of Myocardial Infarction Among Patients Using ARBs and ACEIs**

| <b>Characteristic</b>                   | <b>Hazard Ratio*<br/>(95% CI)</b> | <b>P Value</b> | <b>Interaction<br/>P Value</b> |
|-----------------------------------------|-----------------------------------|----------------|--------------------------------|
| <b>Gender</b>                           |                                   |                |                                |
| Male                                    | 1.009 (0.831-1.225)               | 0.9            | 0.8                            |
| Female                                  | 1.052 (0.805-1.375)               | 0.7            |                                |
| <b>Age</b>                              |                                   |                |                                |
| 20-64 years                             | 1.105 (0.907-1.348)               | 0.3            | 0.2                            |
| ≥ 65 years                              | 0.903 (0.698-1.170)               | 0.4            |                                |
| <b>Charlson Comorbidity Index score</b> |                                   |                |                                |
| 2                                       | 1.323 (0.974-1.798)               | 0.07           | 0.1                            |
| 3                                       | 1.049 (0.752-1.463)               | 0.8            |                                |
| 4                                       | 1.067 (0.726-1.568)               | 0.7            |                                |
| ≥ 5                                     | 0.818 (0.625-1.072)               | 0.1            |                                |
| <b>Hypertension</b>                     |                                   |                |                                |
| Yes                                     | 1.033 (0.877-1.217)               | 0.7            | 0.8                            |
| No                                      | 0.963 (0.556-1.668)               | 0.9            |                                |
| <b>Chronic kidney disease</b>           |                                   |                |                                |
| Yes                                     | 0.911 (0.650-1.277)               | 0.59           | 0.4                            |
| No                                      | 1.062 (0.889-1.268)               | 0.5            |                                |
| <b>Heart failure</b>                    |                                   |                |                                |
| Yes                                     | 0.856 (0.542-1.351)               | 0.5            | 0.4                            |
| No                                      | 1.051 (0.889-1.242)               | 0.6            |                                |
| <b>Coronary artery disease</b>          |                                   |                |                                |
| Yes                                     | 0.914 (0.692-1.208)               | 0.5            | 0.3                            |
| No                                      | 1.085 (0.897-1.313)               | 0.4            |                                |

\* Adjusted for propensity score; ACEI cohort: reference group

Abbreviations: CI, confidence interval; ARBs, Angiotensin II receptor blockers; ACEIs, angiotensin-converting-enzyme inhibitors.
